# Supplementary material for: Repeated Nitrogen Dioxide Exposures and Eosinophilic Airway Inflammation in Asthmatics: A Randomized Crossover Study
Source: PubMed Central journal article supplement (PMC4123022; doi:10.1289/ehp.1307240), 2014-04-18
Supplement: ehp.1307240.s001.pdf [file ehp.1307240.s001.pdf]

## **Supplemental Material**

### **Repeated Nitrogen Dioxide Exposures and Eosinophilic Airway Inflammation in Asthmatics: A Randomized Crossover Study**

Véronique Ezratty, Gaëlle Guillosoou, Catherine Neukirch, Monique Dehoux, Serge Koscielny, Marcel Bonay, Pierre-André Cabanes, Jonathan M. Samet, Patrick Mure, Luc Ropert, Sandra Tokarek, Jacques Lambrozo, and Michel Aubier

| <b>Table of Contents</b>                                                                                                                                                                                               | <b>Page</b> |
|------------------------------------------------------------------------------------------------------------------------------------------------------------------------------------------------------------------------|-------------|
| <b>Table S1.</b> Sample sizes required to estimate statistically significant differences ( $\alpha = 0.05$ ) in percentage of eosinophils in sputum between two exposure groups with a variance of 0.10 and 80% power. | <b>2</b>    |
| <b>Table S2.</b> Absolute values not baseline adjusted (geometric means and 95% confidence intervals) for percentages of eosinophils measured in sputum ( $n = 16$ ).                                                  | <b>3</b>    |
| <b>Table S3.</b> Changes from baseline [geometric mean percentage (95% confidence interval)], for the percentage of eosinophils in sputum with one participant excluded each time.                                     | <b>4</b>    |
| <b>Figure S1.</b> Changes relative to baseline of eosinophil count and percentage of eosinophils for days 1, 2, and 3 ( $n=16$ ).                                                                                      | <b>5</b>    |
| <b>Figure S2.</b> Change from baseline in the logarithm (base 10) of the percentage of eosinophils, for each participant ( $n=16$ ).                                                                                   | <b>6</b>    |
| <b>Figure S3.</b> Correlation between eosinophil cationic protein (ECP) concentration in sputum supernatant (ng/ml) and the number of eosinophils per mg of sputum ( $n=16$ ).                                         | <b>7</b>    |

**Table S1.** Sample sizes required to estimate statistically significant differences ( $\alpha = 0.05$ ) in percentage of eosinophils in sputum between two exposure groups with a variance of 0.10 and 80% power.

| <b>Percentage increase in eosinophils</b> | <b>Sample size (n)</b> |
|-------------------------------------------|------------------------|
| 50%                                       | 51                     |
| 100% (doubling)                           | 18                     |
| 150%                                      | 10                     |

**Table S2.** Absolute values not baseline adjusted (geometric means and 95% confidence intervals) for percentages of eosinophils measured in sputum (n = 16).

| <b>Variable</b>                     | <b>0 ppb NO<sub>2</sub> (clean air)</b> | <b>200 ppb NO<sub>2</sub></b> | <b>600 ppb NO<sub>2</sub></b> | <b><i>p</i>-trend</b> |
|-------------------------------------|-----------------------------------------|-------------------------------|-------------------------------|-----------------------|
| Percentage of eosinophils in sputum | 3.92 (1.92, 8.01)                       | 4.05 (1.99, 8.28)             | 6.44 (3.15, 13.2)             | 0.30                  |

**Table S3.** Changes from baseline (geometric mean percentage (95% confidence interval)), for the percentage of eosinophils in sputum with one participant excluded each time.

| <b>Variable</b>         | <b>0 ppb (clean air)</b> | <b>200 ppb</b> | <b>600 ppb</b> | <b><i>p</i> trend</b> |
|-------------------------|--------------------------|----------------|----------------|-----------------------|
| Participant 2 excluded  | 1% (-23, 32)             | -5% (-27, 25)  | 77% (35, 132)  | 0.03*                 |
| Participant 3 excluded  | -11% (-33, 18)           | -4% (-28, 28)  | 63% (22, 117)  | 0.04*                 |
| Participant 4 excluded  | -4% (-28, 27)            | -1% (-26, 32)  | 71% (28, 129)  | 0.05*                 |
| Participant 5 excluded  | -7% (-31, 24)            | 1% (-24, 35)   | 70% (27, 127)  | 0.05*                 |
| Participant 6 excluded  | -13% (-35, 17)           | -5% (-29, 27)  | 53% (14, 105)  | 0.06                  |
| Participant 7 excluded  | -14% (-35, 14)           | -5% (-28, 25)  | 48% (12, 97)   | 0.07                  |
| Participant 8 excluded  | -20% (-40, 7)            | -10% (-33, 2)  | 46% (8, 96)    | 0.05*                 |
| Participant 9 excluded  | -15% (-35, 12)           | -1% (-25, 3)   | 38% (4, 83)    | 0.09                  |
| Participant 11 excluded | -17% (-38, 11)           | -3% (-27, 3)   | 52% (13, 104)  | 0.05*                 |
| Participant 12 excluded | -20% (-40, 7)            | -13% (-35, 17) | 53% (14, 106)  | 0.03*                 |
| Participant 13 excluded | -7% (-30, 24)            | 6% (-20, 41)   | 81% (35, 141)  | 0.03*                 |
| Participant 14 excluded | -22% (-42, 4)            | -14% (-34, 15) | 38% (3, 86)    | 0.06                  |
| Participant 15 excluded | -26% (-45, -1)           | -19% (-39, 09) | 40% (4, 89)    | 0.03*                 |
| Participant 16 excluded | 4% (-21, 35)             | 25% (-5, 63)   | 62% (24, 113)  | 0.08                  |
| Participant 17 excluded | -13% (-45, 16)           | -10% (-33, 21) | 51% (13, 103)  | 0.06                  |
| Participant 19 excluded | -6% (-28, 24)            | -12% (-33, 15) | 71% (29, 125)  | 0.02*                 |

Participants 1, 10 and 18 did not contribute and so were not included in the analysis.

\**p*-Value<0.05

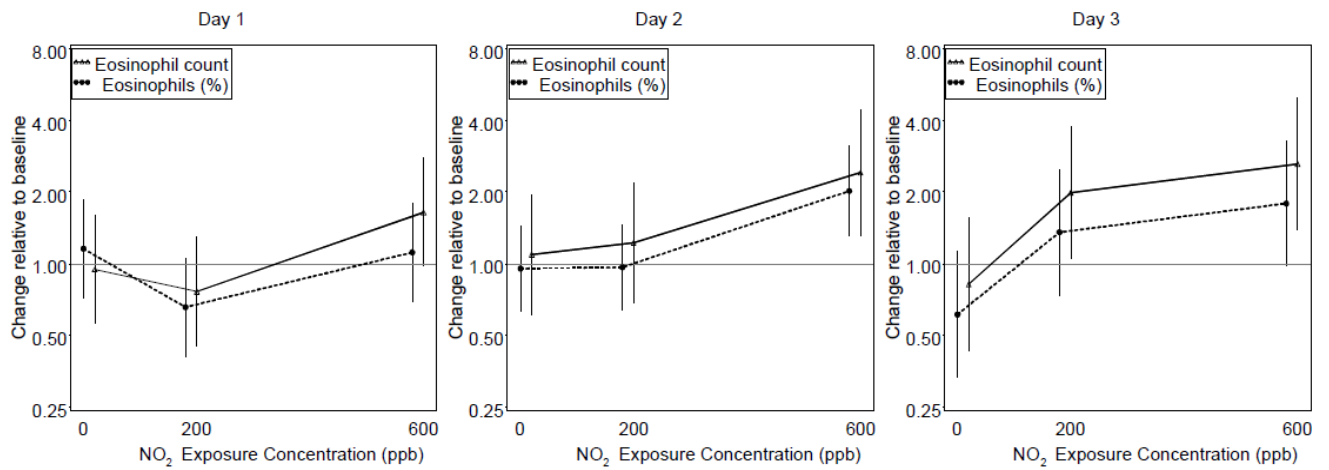

**Figure S1.** Changes relative to baseline of eosinophil count and percentage of eosinophils for days 1, 2, and 3 (n=16).

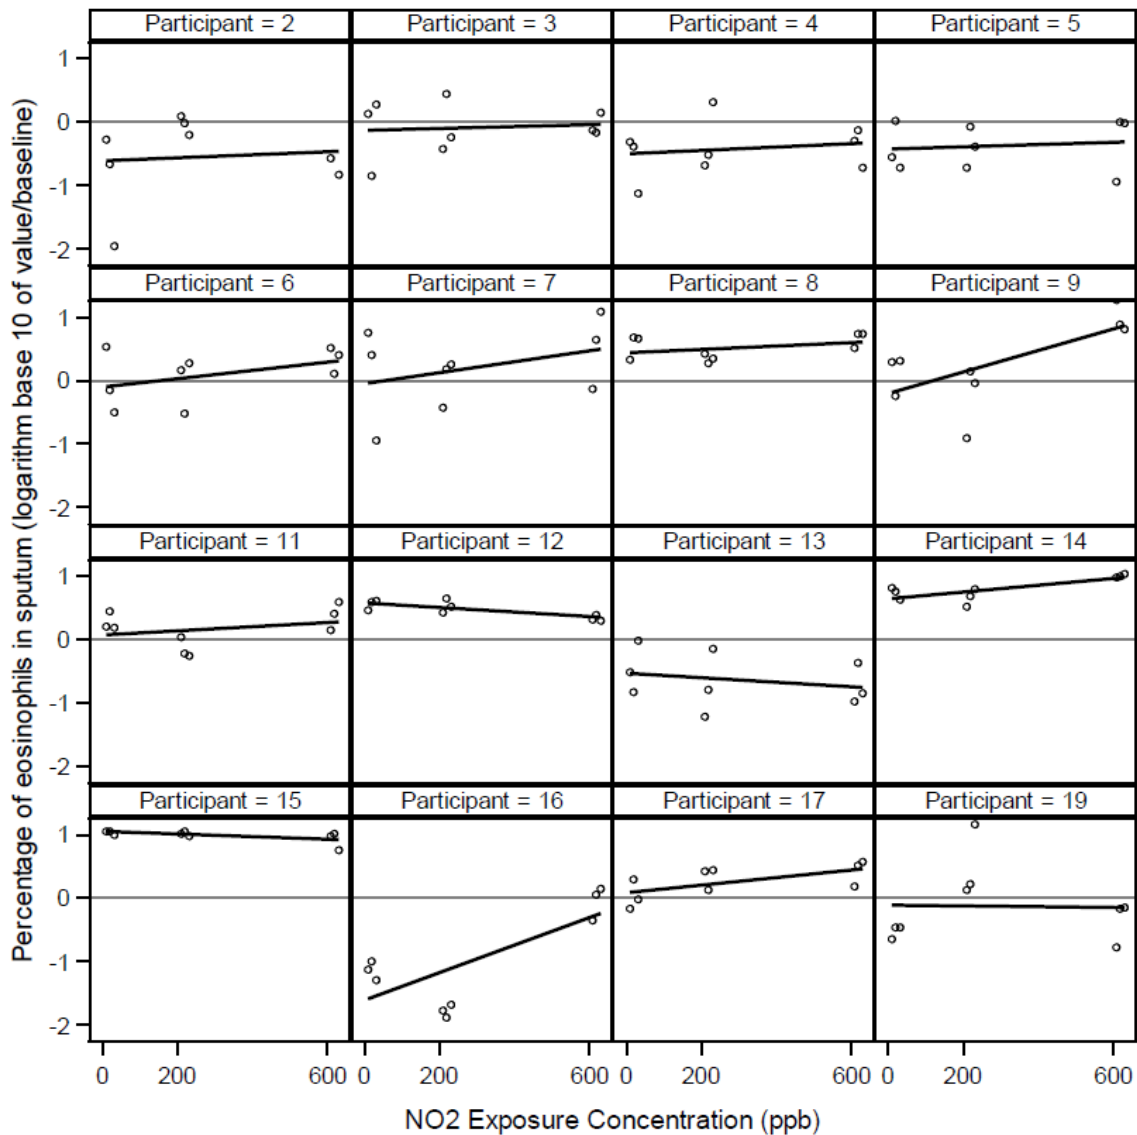

**Figure S2.** Change from baseline in the logarithm (base 10) of the percentage of eosinophils, for each participant (n=16). Individual plots are organized according to the subject number from subject 2 to subject 19. A change of 1 corresponds to a ten-fold increase from baseline. Each subject is identified by his or her percentage of eosinophils at baseline (measured 10 to 30 days before the first exposure).

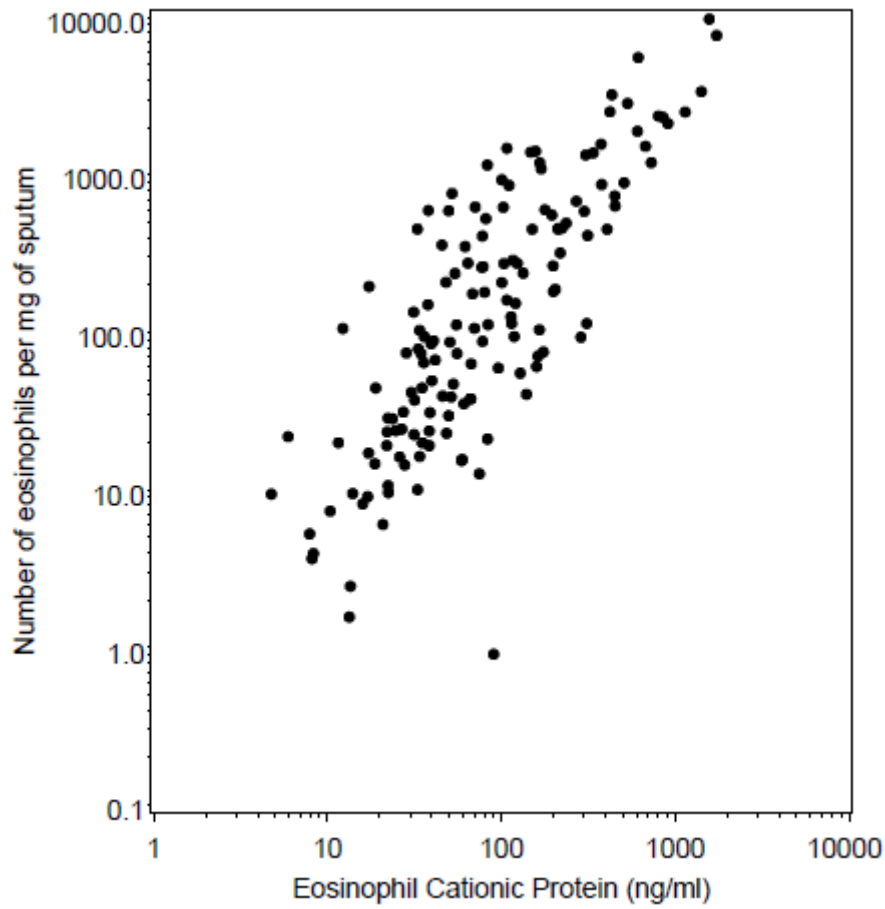

**Figure S3.** Correlation between eosinophil cationic protein (ECP) concentration in sputum supernatant (ng/ml) and the number of eosinophils per mg of sputum (n=16).
